# Supplementary material
Source: PubMed Central journal article supplement (PMC5665729)
Supplement: NIHMS866822-supplement-supplement_1.pdf [file NIHMS866822-supplement-supplement_1.pdf]

**Supplementary Table 1: Multivariate regression analyses with intracellular cytokine production as dependent variables, controlling for sex and batch effects.**

**Supplementary Figure 1: DMF effects on absolute B-cell numbers**

Absolute numbers of circulating double negative memory (CD20<sup>+</sup> CD27<sup>-</sup> IgD<sup>-</sup>), naïve (CD20<sup>+</sup> CD27<sup>-</sup> IgD<sup>+</sup>), class-switched memory (CD20<sup>+</sup> CD27<sup>+</sup> IgD<sup>-</sup>) and non-class-switched memory (CD20<sup>+</sup> CD27<sup>+</sup> IgD<sup>+</sup>) B-cells were calculated using flow cytometry (A-D). Numbers of activated (CD80<sup>+</sup>) memory B-cells were also calculated (E-F). n=6-7 healthy control (71% female), 22 untreated MS (95% female), 16-17 DMF-N (71% female) and 11 DMF-L (55% female). Kruskal Wallis ANOVA with Dunn's multiple comparison test was used to compare groups. Boxplots illustrate median/interquartile range; whiskers and outliers are calculated according to Tukey's method. DMF: dimethyl fumarate; CS: class switched; nCS: non-class switched; DMF-N: non-lymphopenic DMF-treated, DMF-L: lymphopenic, DMF-treated. \* p<0.05, \*\* p<0.01, \*\*\* p<0.001 compared to untreated MS; # p<0.05, ## p<0.01, ### p<0.001 compared to healthy controls.

**Supplementary Figure 2: DMF affects absolute numbers of functionally distinct T-cell subsets**

Absolute numbers of circulating follicular T-cells (CD4<sup>+</sup> CXCR5<sup>+</sup> and CD8<sup>+</sup> CXCR5<sup>+</sup>; A-B), CD39<sup>+</sup> T-regulatory cells (CD4<sup>+</sup> CD25<sup>+</sup> Foxp3<sup>+</sup>, C) and mucosal invariant T-cells

(CD8<sup>+</sup> CD161<sup>+</sup>; D) were calculated using flow cytometry on whole blood. n=9-10 healthy control (70% female), 21 (CD39) or 36 untreated MS (64% or 83% female) 49-50 DMF treated (70% female; 14-16 lymphopenic). Kruskal Wallis ANOVA with Dunn's multiple comparison test was used to compare groups. Boxplots illustrate median/interquartile range; whiskers and outliers are calculated according to Tukey's method. \* p<0.05, \*\* p<0.01, \*\*\* p<0.001.

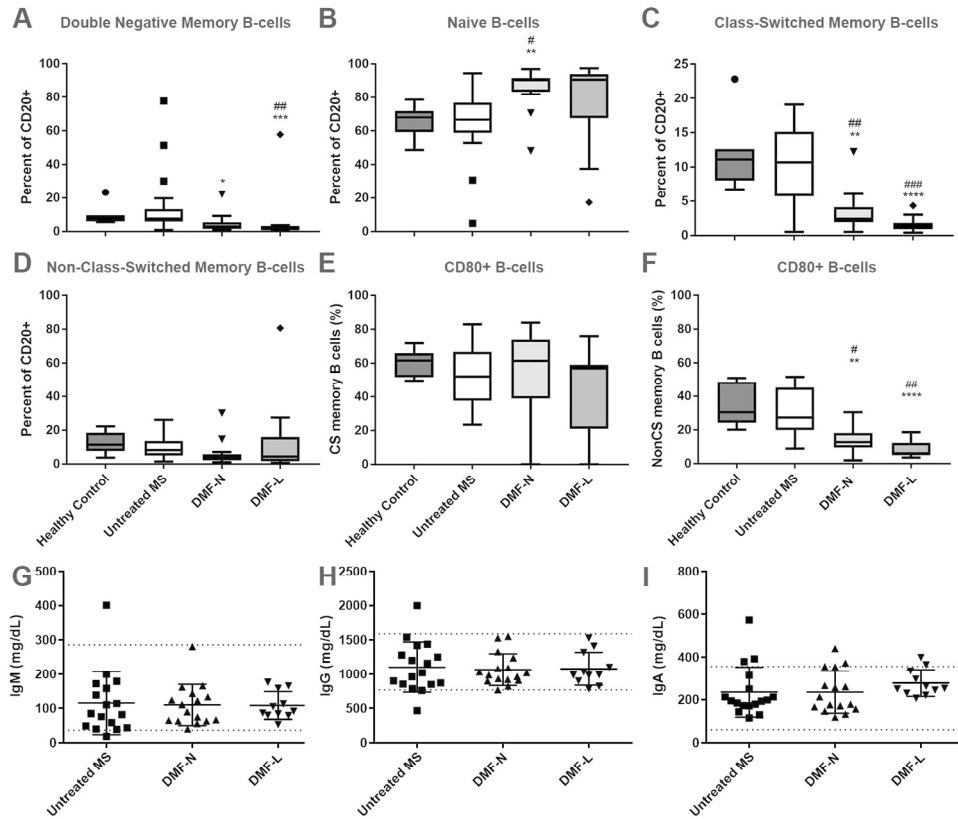

Figure 2: DMF effects on circulating B-cell phenotype and function

Double negative memory (CD20+ CD27- IgD-), naïve (CD20+ CD27- IgD+), class-switched memory (CD20+ CD27+ IgD-) and non-class-switched memory (CD20+ CD27+ IgD+) B-cells were identified using flow cytometry (A-D). The proportion of activated (CD80+) memory B-cells was also calculated (E-F). n=6-7 healthy control (71% female), 22 untreated MS (95% female), 16-17 DMF-N (71% female) and 11 DMF-L (55% female). Serum concentrations of immunoglobulins were also quantified (H-J); n=17 untreated MS, 16 DMF-N and 11 DMF-L. Kruskal Wallis ANOVA with Dunn's multiple comparison test was used to compare groups. Boxplots illustrate median/interquartile range; whiskers and outliers are calculated according to Tukey's method. Dotted lines (H-J) delineate the upper and lower limits of normal. DMF: dimethyl fumarate; CS: class switched; nCS: non-class switched; DMF-N: non-lymphopenic DMF-treated, DMF-L: lymphopenic, DMF-treated. \* p<0.05, \*\* p<0.01, \*\*\* p<0.001 compared to untreated MS; # p<0.05, ## p<0.01, ### p<0.001 compared to healthy controls.

142x122mm (300 x 300 DPI)

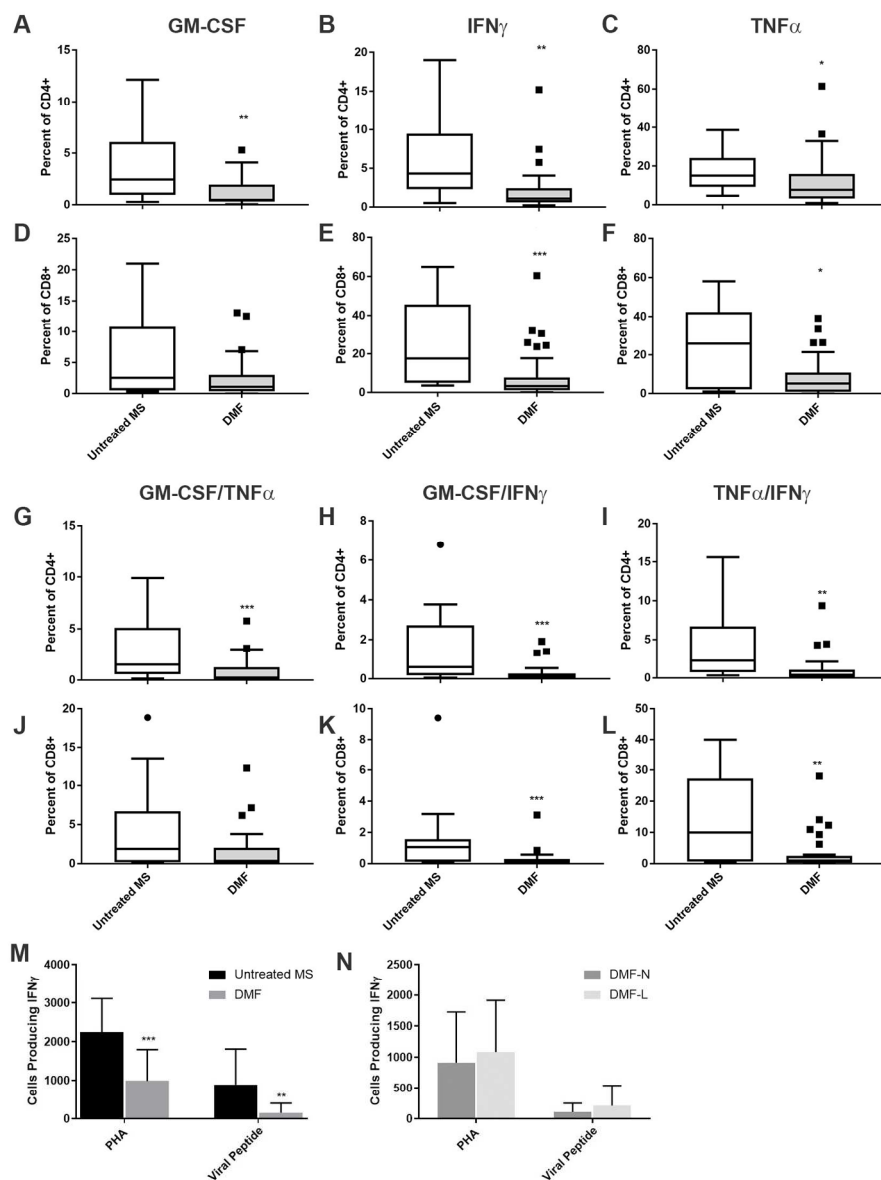

Figure 3: DMF effects on T-cell cytokine production

The proportion of CD4+ (A-C, G-I) and CD8+ (D-F, J-L) T-cells producing cytokines was evaluated using intracellular flow cytometry after exposure to antigen-independent stimulation (PMA/ionomycin). M-N: Lymphocyte production of cytokines was evaluated by ELISPOT after exposure to antigen independent (PHA) and dependent (viral peptide pool) stimuli. Numbers of cells producing IFN- $\gamma$  were compared between untreated and DMF treated MS patients (M) and between non-lymphopenic and lymphopenic DMF treated MS patients (N). n=13-16 untreated MS (75% female), 29-33 DMF (14-15 lymphopenic; 70% female) for A-L. n=11 untreated MS, 22 DMF (10 lymphopenic) for M-N. Mann-Whitney U test was used to compare groups. Boxplots illustrate median/interquartile range; whiskers and outliers are calculated according to Tukey's method. DMF-N: non-lymphopenic DMF-treated, DMF-L: lymphopenic, DMF-treated, PHA: phorbol 12-myristate 13-acetate, PHA: phytohemagglutinin. \* p<0.05, \*\* p<0.01, \*\*\* p<0.001.

147x189mm (300 x 300 DPI)



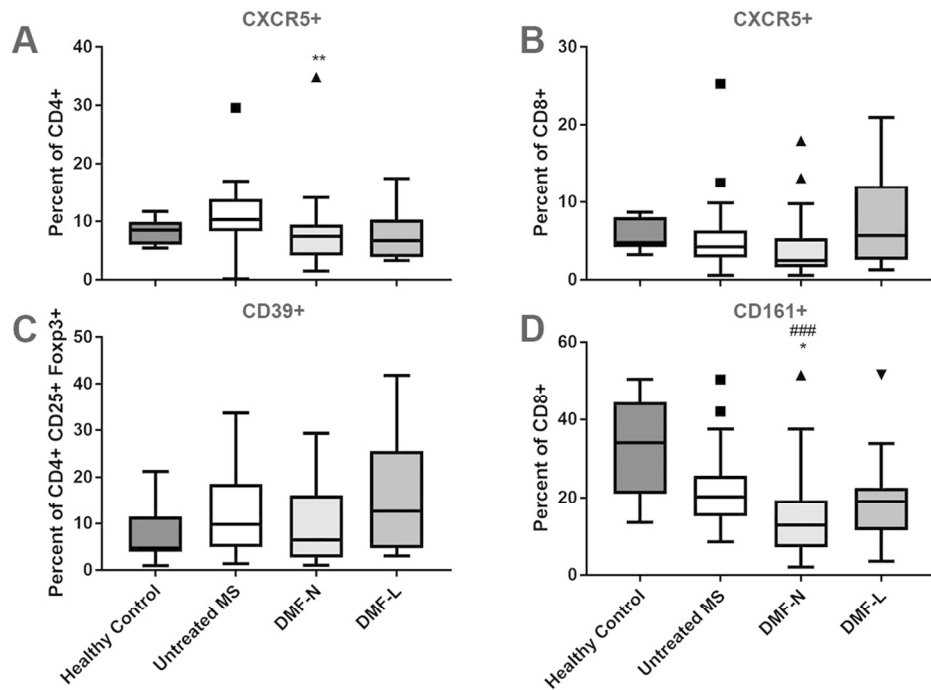

Figure 4: DMF effects on functionally distinct T-cell subsets

Proportions of circulating follicular T-cells (CD4+ CXCR5+ and CD8+ CXCR5+; A-B), CD39+ T-regulatory cells (CD4+ CD25+ Foxp3+, C) and mucosal invariant T-cells (CD8+ CD161+; D) were calculated using flow cytometry. n=9-10 healthy control (70% female), 21 (CD39) or 36 untreated MS (64% or 83% female) 49-50 DMF treated (70% female; 14-16 lymphopenic). Kruskal Wallis ANOVA with Dunn's multiple comparison test was used to compare groups. Boxplots illustrate median/interquartile range; whiskers and outliers are calculated according to Tukey's method. DMF-N: non-lymphopenic DMF-treated, DMF-L: lymphopenic, DMF-treated. \*  $p < 0.05$ , \*\*  $p < 0.01$ , \*\*\*  $p < 0.001$ .

105x77mm (300 x 300 DPI)

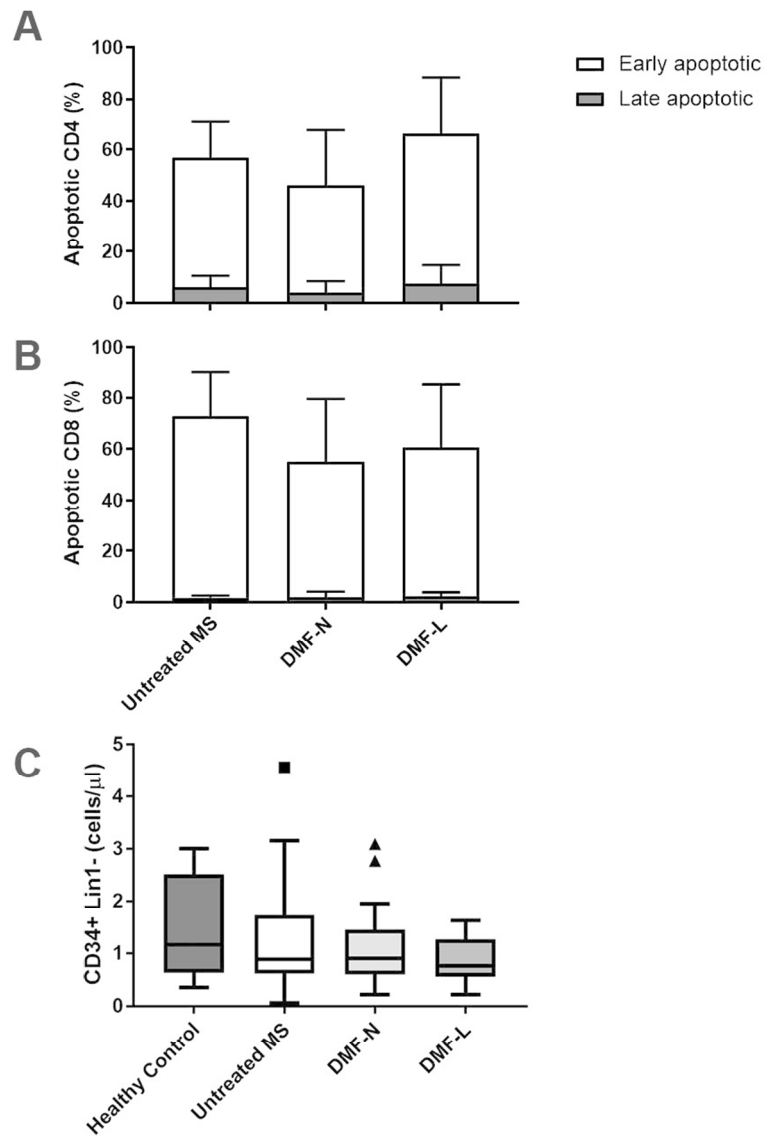

Figure 5: No significant effects of DMF on activation induced cell death or circulating hematopoietic progenitor cells

PBMC were stimulated with anti-CD3/anti-CD28 and stained for Annexin V and propidium iodide (PI) to quantify activation induced cell death (A-B). Annexin V-PE+/PI- and Annexin V-PE+/PI+ populations were considered early and late apoptotic cells, respectively. Circulating hematopoietic progenitor cells (CD34+ Lin1-) were identified using flow cytometry (C). DMF-N: non-lymphopenic DMF-treated, DMF-L: lymphopenic, DMF-treated. n=13 untreated MS (77% female), 15 DMF-N (87% female), 14 DMF-L (50% female) for activation induced cell death (A-B). n=12 healthy controls, 20 untreated MS, 26 DMF-N, and 7 DMF-L for circulating progenitors.

76x114mm (300 x 300 DPI)

| <i>Dependent Variables</i> | <i>N</i> | <i>SE of estimate</i> | <i>R<sup>2</sup></i> | <i>B for DMF</i> | <i>B for sex</i> | <i>B for batch</i> |
|----------------------------|----------|-----------------------|----------------------|------------------|------------------|--------------------|
| <b>CD4</b>                 |          |                       |                      |                  |                  |                    |
| IL-10                      | 42       | 0.373                 | 0.262                | -0.279*          | 0.181            | -0.144*            |
| IL-4                       | 42       | 2.100                 | 0.032                | 0.410            | -0.221           | -0.282             |
| GM-CSF                     | 42       | 2.442                 | 0.249                | -2.875**         | -0.008           | -0.149             |
| TNF                        | 42       | 12.611                | 0.036                | -4.774           | 0.085            | 0.656              |
| IFN                        | 42       | 4.208                 | 0.205                | -4.141**         | -1.179           | 0.087              |
| IL-17                      | 42       | 0.343                 | 0.091                | -0.211           | -0.010           | -0.029             |
| GM-CSF/TNF                 | 42       | 2.072                 | 0.216                | -2.231**         | -0.020           | 0.076              |
| GM-CSF/IFN                 | 42       | 1.187                 | 0.223                | -1.287**         | -0.128           | -0.037             |
| IFN/TNF                    | 42       | 3.280                 | 0.198                | -3.078**         | -0.842           | 0.065              |
| <b>CD8</b>                 |          |                       |                      |                  |                  |                    |
| IL-10                      | 49       | 0.457                 | 0.183                | 0.170            | 0.291            | -0.097             |
| IL-4                       | 49       | 2.822                 | 0.223                | -0.074           | 2.716**          | -0.579             |
| GM-CSF                     | 49       | 4.459                 | 0.243                | -3.300*          | 4.313**          | 0.026              |
| TNF                        | 49       | 14.213                | 0.304                | -16.442***       | 4.698            | 2.875              |
| IFN                        | 49       | 16.004                | 0.220                | -14.602**        | -0.681           | 2.931              |
| IL-17                      | 49       | 0.363                 | 0.108                | 0.120            | 0.142            | -0.069             |
| GM-CSF/TNF                 | 49       | 3.705                 | 0.252                | -2.982*          | 3.470**          | 0.154              |
| GM-CSF/IFN                 | 49       | 1.306                 | 0.258                | -1.221**         | 0.541            | 0.280*             |
| IFN/TNF                    | 49       | 9.004                 | 0.279                | -9.878**         | -1.028           | 1.737              |

\* p<0.05; \*\* p<0.01; \*\*\* p<0.001



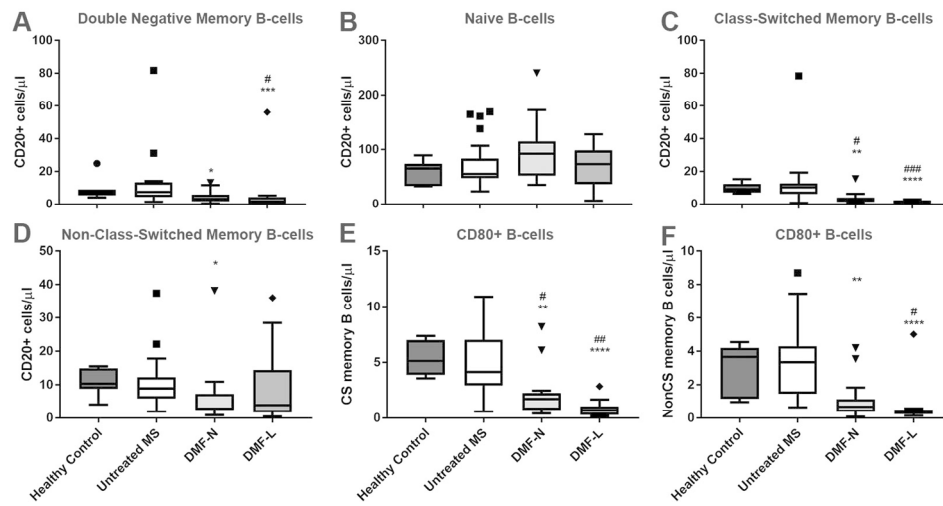

145x74mm (300 x 300 DPI)

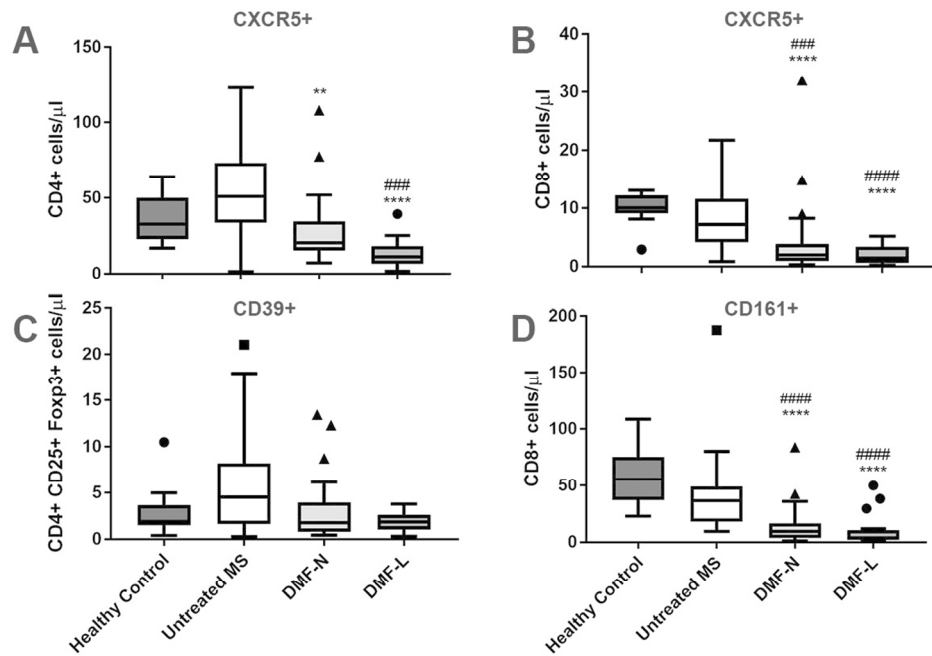

105x74mm (300 x 300 DPI)
